# Supplementary material
Source: PubMed Central journal article supplement (PMC1885898)
Supplement: NIHMS20401-supplement-Table_S1.pdf [file NIHMS20401-supplement-Table_S1.pdf]

SUPPLEMENTAL MATERIAL

Table S1. PATHWAYS predicted coupling values (using HARLEM software) (17-19) and optimal electron-transfer paths for various Tyr and Trp candidates in *Mtb* KatG (PDB Code 2CCA)<sup>a</sup>:

| Donor/Acceptor               | Optimal pathway                                              | Pathway distance (Å) | Predicted coupling       |
|------------------------------|--------------------------------------------------------------|----------------------|--------------------------|
| Y229/Heme Fe                 | Y229⇒W107⇒Heme                                               | 5.009                | 1.8896x10 <sup>-3</sup>  |
| Y353/Heme Fe                 | Y353⇒MET377→LEU378⇒Heme                                      | 11.180               | 3.7048x10 <sup>-5</sup>  |
| W107/Heme Fe                 | W107⇒Heme                                                    | 3.350                | 2.1812x10 <sup>-2</sup>  |
| W91/Heme Fe                  | W91⇒HOH47⇒HOH487⇒Heme                                        | 6.882                | 2.0077x10 <sup>-4</sup>  |
| Y337(predicted doublet)/Heme | Y337→LEU336⇒PHE332⇒HIS270→Heme                               | 14.768               | 1.1826x10 <sup>-6</sup>  |
| Y413(predicted doublet)/Heme | Y413→TRP412⇒Heme                                             | 8.815                | 4.3806x10 <sup>-4</sup>  |
| Y197(predicted doublet)/Heme | Y197⇒ARG114→TYR113⇒MET255⇒TYR229⇒TRP107⇒Heme                 | 19.421               | 2.4165x10 <sup>-8</sup>  |
| Y28(predicted doublet)/Heme  | Y28→LYS27⇒PRO40→TRP39⇒SER134→TRP135→PRO136→ASP137⇒HOH89⇒Heme | 36.249               | 2.7150x10 <sup>-14</sup> |
| Y210(predicted singlet)/Heme | Y210⇒ASP247→ILE248⇒Heme                                      | 12.343               | 1.1444x10 <sup>-6</sup>  |
| Y339(predicted singlet)/Heme | Y339⇒PRO375→THR376→MET377→LEU378⇒Heme                        | 18.553               | 1.6502x10 <sup>-7</sup>  |
| Y353/Y229                    | Y353→GLN352→TRP351⇒HOH247⇒PRO232→ASN231→VAL230→Y229          | 16.613               | 1.7736x10 <sup>-6</sup>  |
| W91/Y229                     | W91⇒SER140→ALA139→ASN138→ASP137→ILE228→Y229                  | 19.549               | 1.8413x10 <sup>-7</sup>  |

<sup>a</sup> A through-bond coupling is indicated by →; through-space jumps and hydrogen bonds are indicated by ⇒.
